# Supplementary material for: SOX2 regulates homeostasis of taste bud cells and lingual epithelial cells in posterior tongue
Source: PubMed Central journal article supplement (PMC7561181; doi:10.1371/journal.pone.0240848), 2020-10-15
Supplement: pone.0240848.s005.pdf [file pone.0240848.s005.pdf]

Table S1. Antibodies used for immunohistochemistry and *in situ* hybridization analyses.

| Antibody                                               | Manufacture              | Catalog No. | RRID number     |
|--------------------------------------------------------|--------------------------|-------------|-----------------|
| Rabbit anti-KCNQ1                                      | Millipore                | AB5932      | RRID:AB_92147   |
| Goat anti-KCNQ1                                        | Santa Cruz Biotechnology | sc-10646    | RRID:AB_2131554 |
| Goat anti-SOX2                                         | Santa Cruz Biotechnology | sc-17320    | RRID:AB_2286684 |
| Rabbit anti-POU2F3                                     | Santa Cruz Biotechnology | sc-330      | RRID:AB_677443  |
| Rabbit anti-DDC                                        | GeneTex                  | GTX30448    | RRID:AB_367199  |
| Mouse anti-PCNA                                        | Millipore                | NA03        | RRID:AB_2160355 |
| Rabbit anti-active CASP3                               | BD Biosciences           | 559565      | RRID:AB_397274  |
| Rabbit anti-Ki67                                       | Abcam                    | ab15580     | RRID:AB_443209  |
| Rat anti-BCL11B                                        | Abcam                    | ab18465     | RRID:AB_2064130 |
| Biotin-conjugated Goat anti-rabbit IgG                 | Vector Laboratories      | BA-1000     | RRID:AB_2313606 |
| Biotin-conjugated Horse anti-goat IgG                  | Vector Laboratories      | BA-9500     | RRID:AB_2336123 |
| Biotin-conjugated Goat anti-rat IgG                    | Vector Laboratories      | BA-9400     | RRID:AB_2336202 |
| Alexa488-conjugated Goat anti-mouse IgG                | Thermo Fisher            | A11029      | RRID:AB_2534088 |
| Alexa488-conjugated Goat anti-Rabbit IgG               | Thermo Fisher            | A11034      | RRID:AB_2576217 |
| Alexa488-conjugated Donkey anti-Goat IgG               | Thermo Fisher            | A11055      | RRID:AB_2534102 |
| Alexa488-conjugated Donkey anti-Rabbit IgG             | Thermo Fisher            | A21206      | RRID:AB_2535792 |
| Alexa555-conjugated Donkey anti-Goat IgG               | Thermo Fisher            | A21432      | RRID:AB_2535853 |
| Alexa647-conjugated Donkey anti-Goat IgG               | Thermo Fisher            | A21447      | RRID:AB_2535864 |
| Alexa555-conjugated Donkey anti-Rabbit IgG             | Thermo Fisher            | A31572      | RRID:AB_162543  |
| Alkaline phosphatase-conjugated Sheep anti-digoxigenin | Roche Diagnostics        | 11093274910 | RRID:AB_514497  |
