# Supplementary material for: SOX2 regulates homeostasis of taste bud cells and lingual epithelial cells in posterior tongue
Source: PubMed Central journal article supplement (PMC7561181; doi:10.1371/journal.pone.0240848), 2020-10-15
Supplement: pone.0240848.s006.pdf [file pone.0240848.s006.pdf]

Table S2. Probes used for *in situ* hybridization analyses.

---

| Gene Name      | Accession No. | Probe Region |
|----------------|---------------|--------------|
| <i>Lgr5</i>    | BC156649      | 37-2760      |
| <i>Sprr2a2</i> | BC010818      | 1-738        |
| <i>Entpd2</i>  | NM_009849     | 20-1822      |
| <i>Krt5</i>    | BC108361      | 1860-2253    |
| <i>Krt14</i>   | BC011074      | 1311-1680    |
| <i>Krt35</i>   | BC100542      | 1-1869       |
| <i>Krt84</i>   | BC114971      | 1-2161       |
| <i>Pax9</i>    | BC005794      | 1-1635       |

---
