# Supplementary material for: SOX2 regulates homeostasis of taste bud cells and lingual epithelial cells in posterior tongue
Source: PubMed Central journal article supplement (PMC7561181; doi:10.1371/journal.pone.0240848), 2020-10-15
Supplement: pone.0240848.s007.pdf [file pone.0240848.s007.pdf]

Table S3. Information on primers used for qPCR analyses.

| Gene          | Accession No. | Amplified region | Forward primer         | Reverse primer         |
|---------------|---------------|------------------|------------------------|------------------------|
| <i>Gapdh</i>  | BC085315      | 735-843          | GCATGGCCTTCCGTGTTCCCTA | GATGCCTGCTTCACCACCTTCT |
| <i>Krt5</i>   | BC108361      | 1185-1288        | TGGCGATGACCTTCGAAACA   | GGTTGGCACACTGCTTCTTG   |
| <i>Krt14</i>  | BC011074      | 987-1140         | GGTTCCTCAGCAAGACAGAGG  | TCCAGGGATGCTTTCATGCTG  |
| <i>Lgr5</i>   | BC156649      | 1522-1720        | TAAAGACGACGGCAACAGTG   | GATTCGGATCAGCCAGCTAC   |
| <i>Sprr2a</i> | BC010818      | 110-230          | GAAGTGCCTGAGCCTTGTC    | CTCATAGCACACTACAGGACG  |
| <i>Bcl11b</i> | NM_001079883  | 2715-2839        | AGTGGCAGCTGTGCAACTACG  | GTAGACGCTGAAGGGCATCTG  |
| <i>Pax9</i>   | BC005794      | 880-1040         | CACGCAGTGAATGGATTGGAG  | GCAGCACTGTAGGTCATGTAG  |
| <i>Krt35</i>  | BC100542      | 896-1053         | CTGGTATGACACCCAGACCGA  | AGTCCAAAGCATCTCTCATGC  |
| <i>Krt84</i>  | BC114971      | 1396-1556        | ATGAATGTCAAGCTGGCCCTG  | CTGGATCCAGAGACTAACTCG  |
